# Supplementary material for: Dysbiosis Triggers ACF Development in Genetically Predisposed Subjects
Source: MDPI journal article supplement (doi:10.3390/cancers13020283), 2021-01-14

# Eubacteriaceae

*FDR: 2.800e-04*  
*Coefficient: 1.67e+00*  
*Value: Wi*

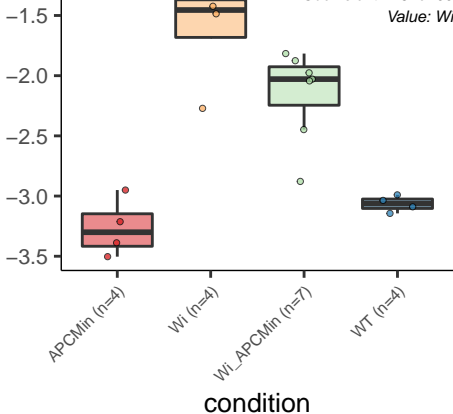

# Eubacteriaceae

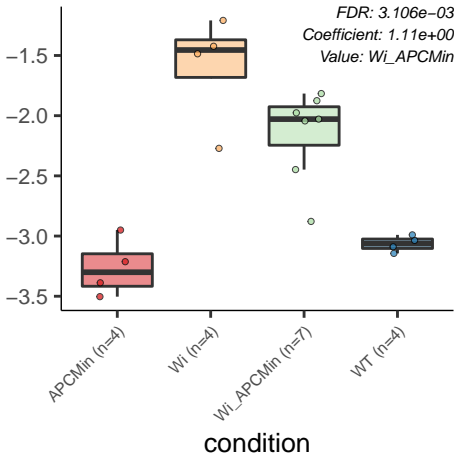

Acholeplasmataceae

FDR: 3.360e-03

Coefficient: 1.73e+00

Value:  $Wi\_APCMin$

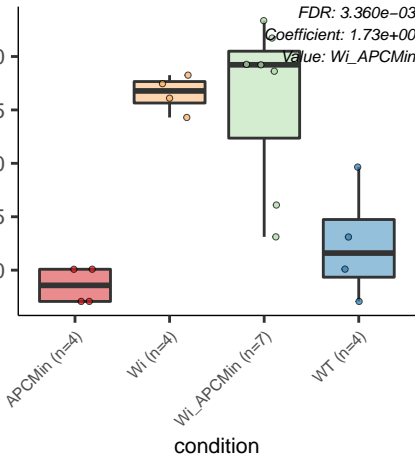

Lactobacillaceae

-1.2  
-1.6  
-2.0  
-2.4

APCMin (n=4)

Wi (n=4)

Wi\_APCMin (n=7)

WT (n=4)

condition

FDR: 3.360e-03  
Coefficient: -7.91e-01  
Value: Wi\_APCMin

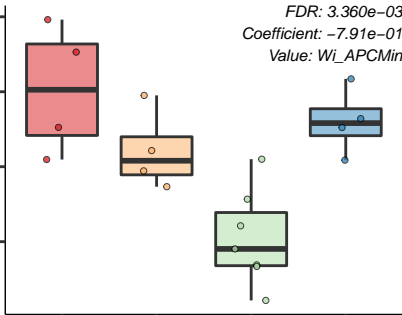

Deferribacteraceae

FDR: 3.392e-03

Coefficient: 1.93e+00

Value: Wi

-2

-3

-4

APCMin (n=4)

Wi (n=4)

Wi\_APCMin (n=7)

WT (n=4)

condition

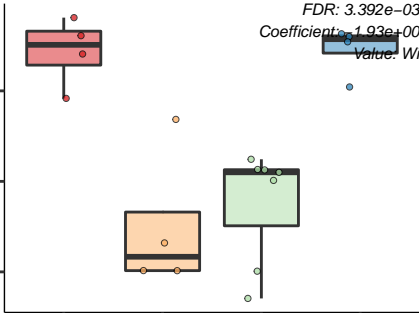

Deferribacteraceae

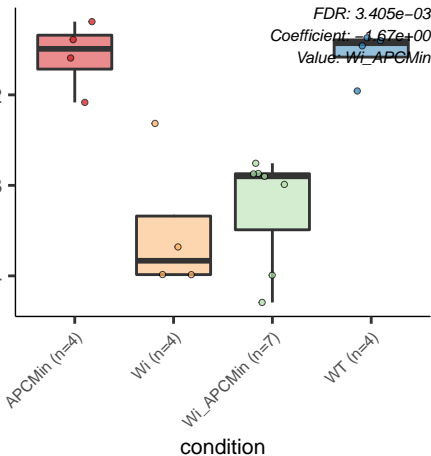

Acholeplasmataceae

FDR: 4.243e-03

Coefficient: 1.79e+00

Value: Wi

APCMin (n=4)

Wi (n=4)

Wi\_APCMin (n=7)

WT (n=4)

condition

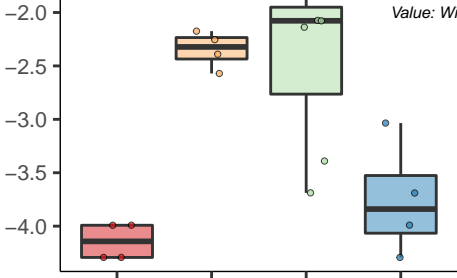

Clostridiaceae\_2

FDR: 4.270e-03

Coefficient: 1.21e+00

Value: Wi

APCMin (n=4)

Wi (n=4)

Wi\_APCMin (n=7)

WT (n=4)

condition

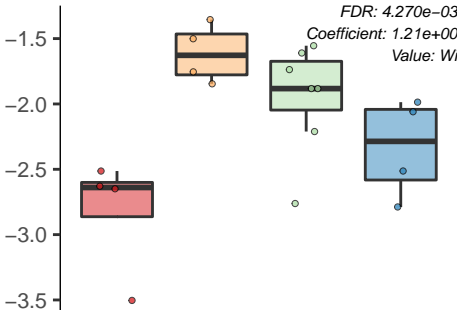



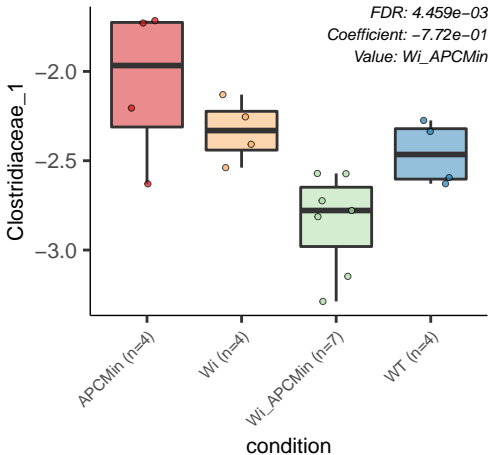

Verrucomicrobiaceae

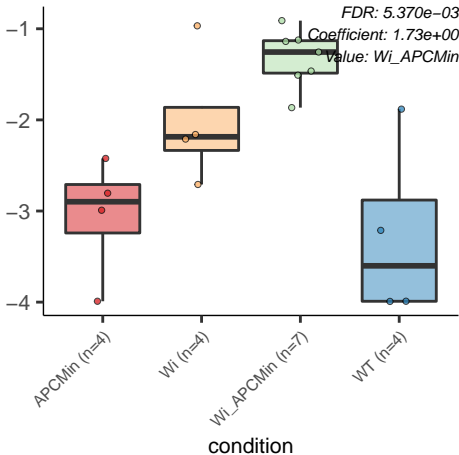

Helicobacteraceae

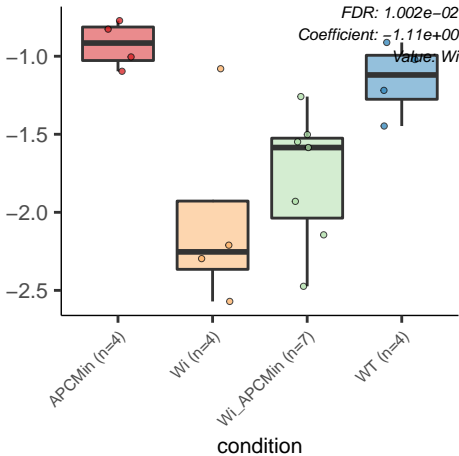

# Prevotellaceae

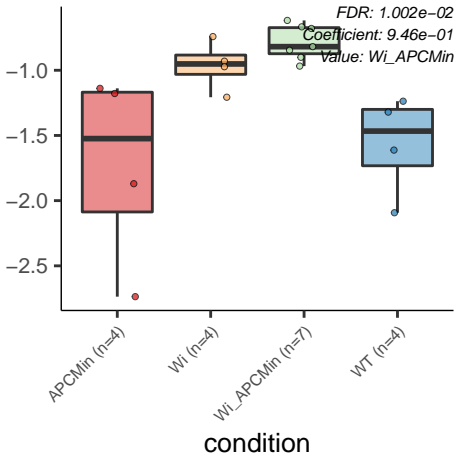

Coriobacteriaceae

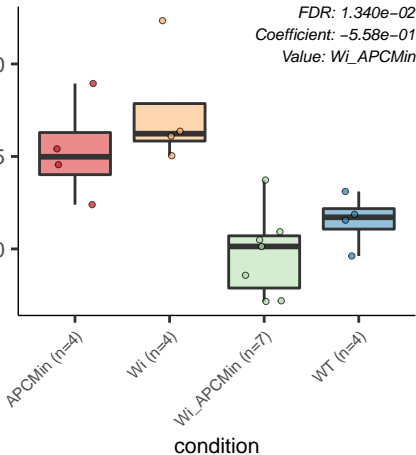

Clostridiaceae\_2

FDR: 1.340e-02

Coefficient: 8.75e-01

Value: Wi\_APCMin

APCMin (n=4)

Wi (n=4)

Wi\_APCMin (n=7)

WT (n=4)

condition

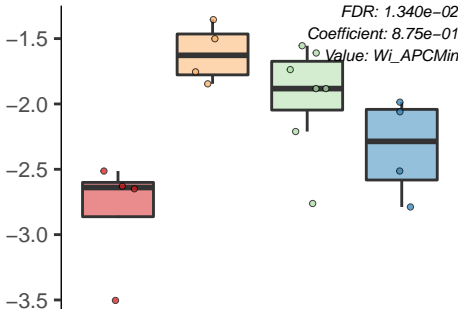

Enterobacteriaceae

FDR: 1.703e-02

Coefficient: -1.27e+00

Value: Wi

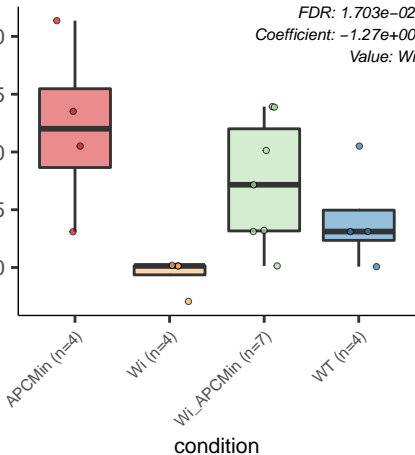

# Bacteroidaceae

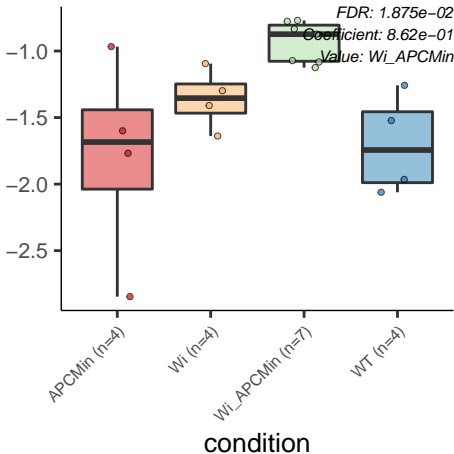



Helicobacteraceae

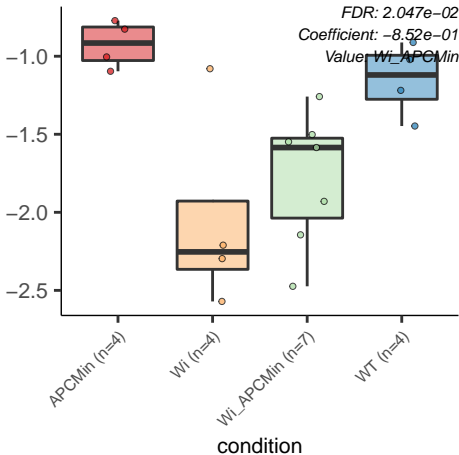

# Prevotellaceae

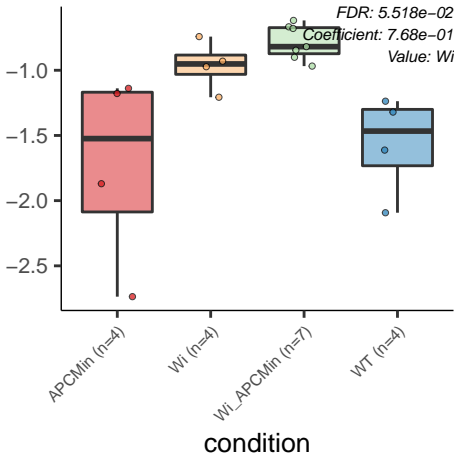

# Rikenellaceae

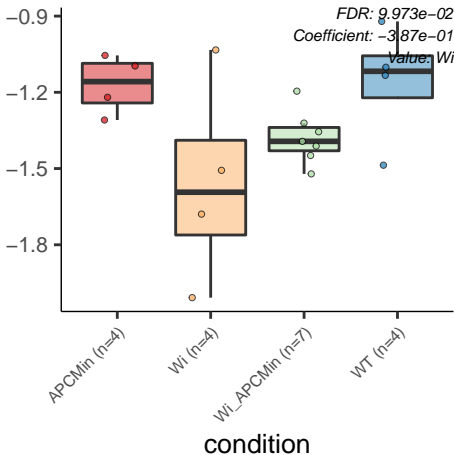

Verrucomicrobiaceae

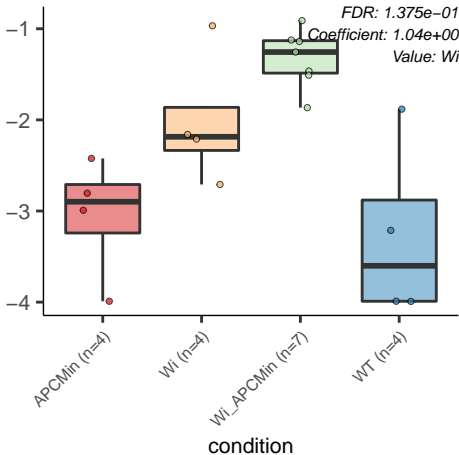

Enterobacteriaceae

FDR: 1.532e-01

Coefficient: -7.92e-01

Value: WT

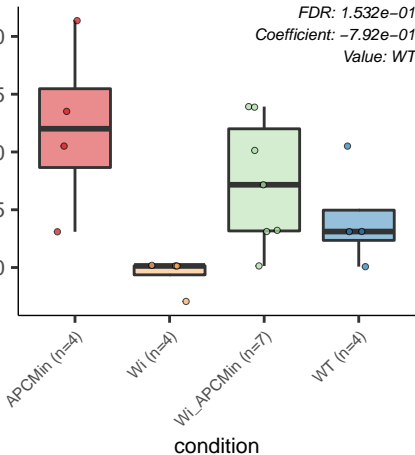



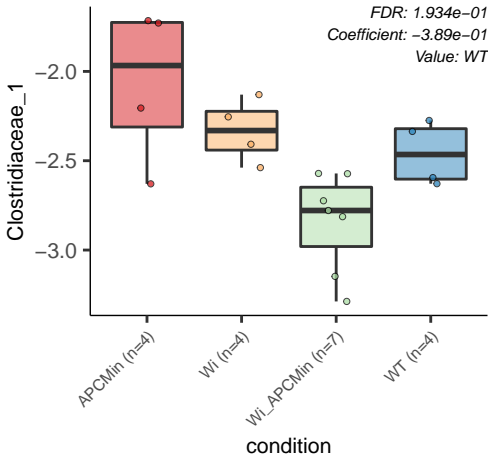

Cyclobacteriaceae

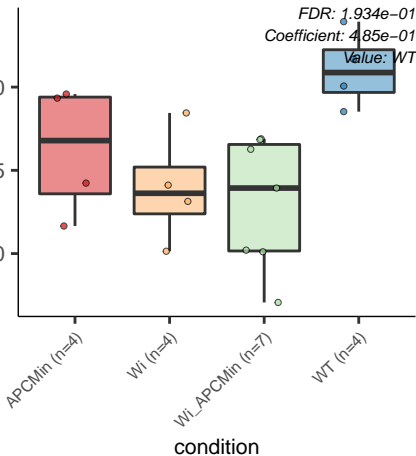



Anaeroplasmataceae

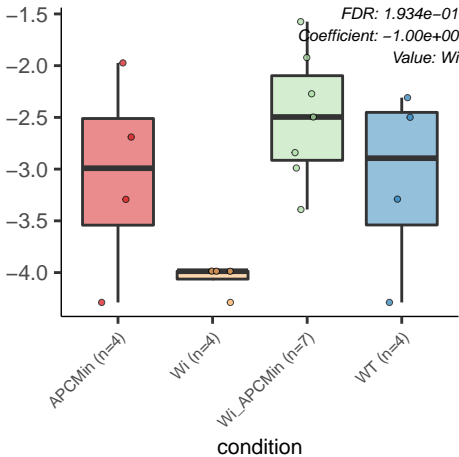

# Lachnospiraceae

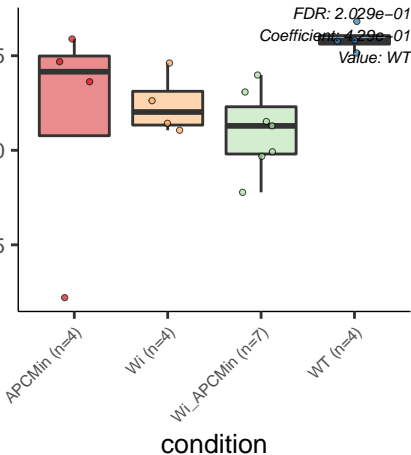

Lactobacillaceae

*FDR: 2.192e-01*  
*Coefficient: -3.27e-01*  
*Value: Wi*

APCMin (n=4)

Wi (n=4)

Wi\_APCMin (n=7)

WT (n=4)

condition

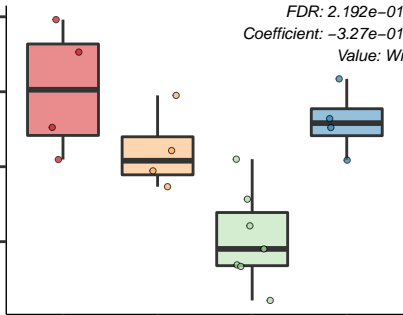

Clostridiaceae\_2

FDR: 2.284e-01

Coefficient: 4.87e-01

Value: WT

-1.5

-2.0

-2.5

-3.0

-3.5

APCMin (n=4)

Wi (n=4)

Wi\_APCMin (n=7)

WT (n=4)

condition

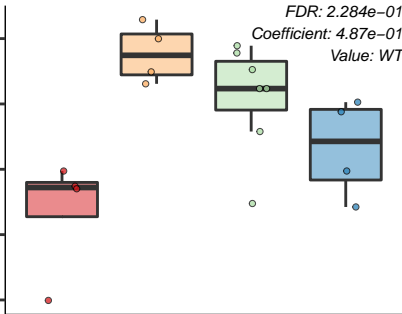

Desulfovibrionaceae

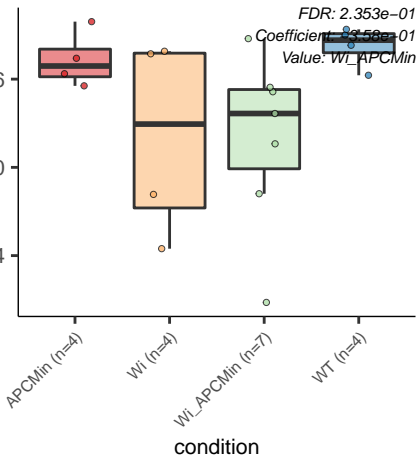

Erysipelotrichaceae

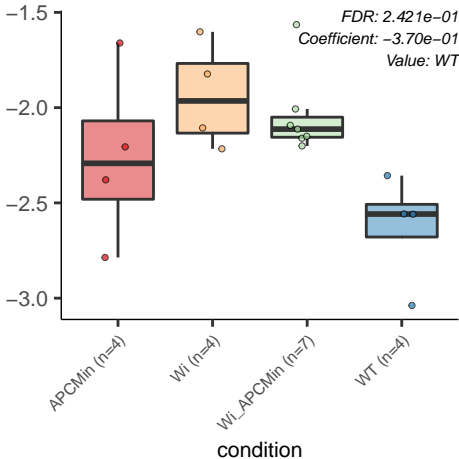

Porphyromonadaceae

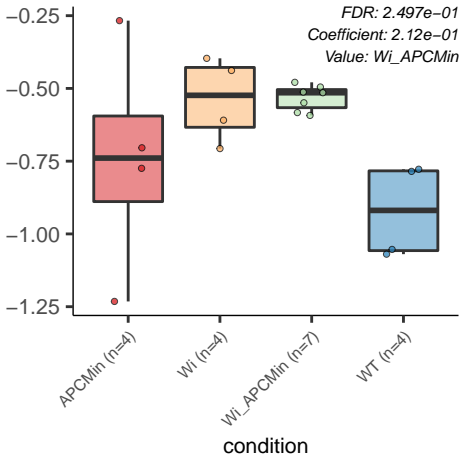

Supplement: s1 [file s1]
