# Supplementary material for: Dysbiosis Triggers ACF Development in Genetically Predisposed Subjects
Source: MDPI journal article supplement (doi:10.3390/cancers13020283), 2021-01-14

Alloprevotella

FDR: 7.814e-05

Coefficient: 1.79e+00

Value: Wi\_APCMin

-2

-3

-4

APCMin (n=4)

Wi (n=4)

Wi\_APCMin (n=7)

WT (n=4)

condition

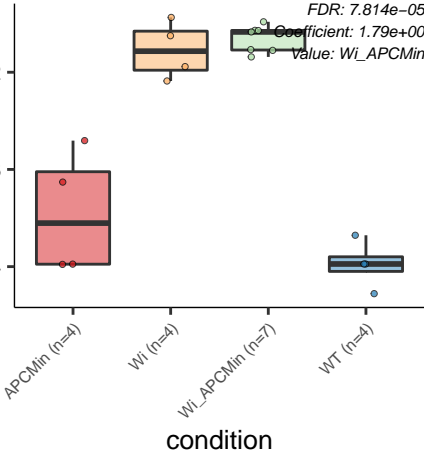

Eubacterium

*FDR: 1.012e-04*  
*Coefficient: 1.83e+00*  
*Value: Wi*

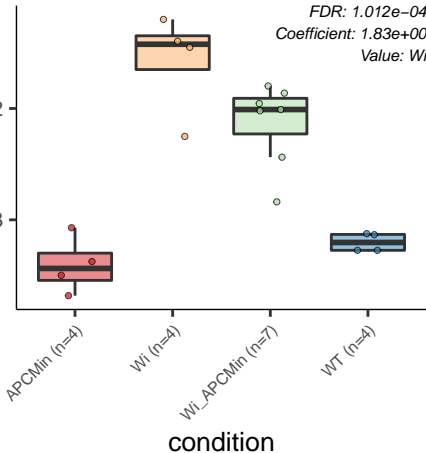

Alloprevotella

FDR: 2.522e-04

Coefficient: 1.67e+00

Value: Wi

APCMin (n=4)

Wi (n=4)

Wi\_APCMin (n=7)

WT (n=4)

condition

-2  
-3  
-4

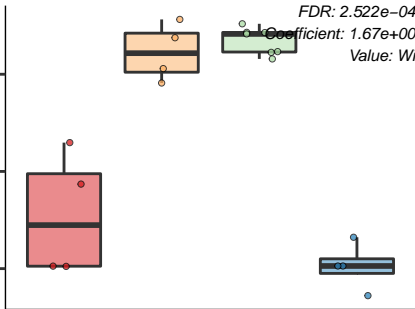

Eubacterium

*FDR: 8.269e-04*  
*Coefficient: 1.27e+00*  
*Value: Wi\_APCMin*

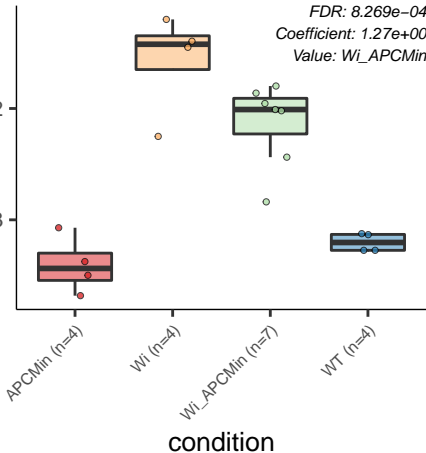

Paraprevotella

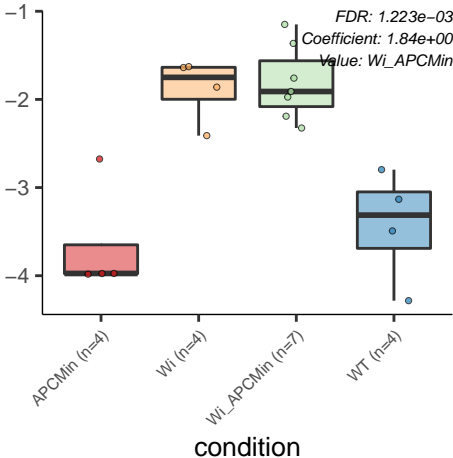

Rikenella

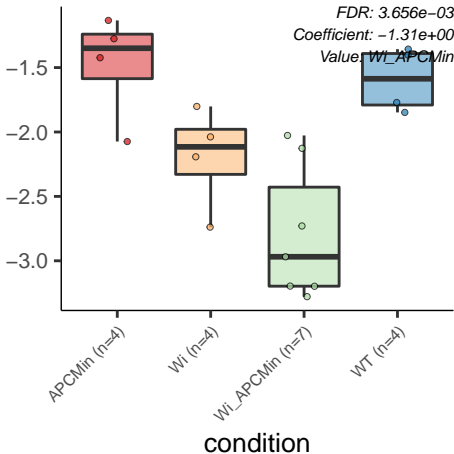

Paraprevotella

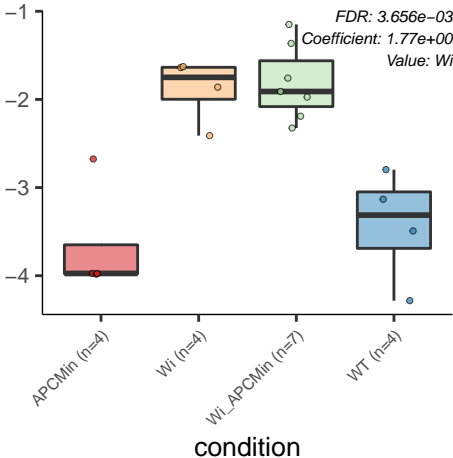

Lactobacillus

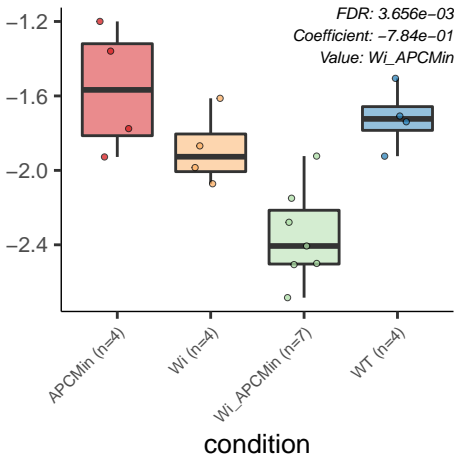



Acholeplasma

FDR: 3.656e-03

Coefficient: 1.75e+00

Value:  $W_i\_APCMin$

APCMin (n=4)

Wi (n=4)

Wi\_APcMin (n=7)

WT (n=4)

condition

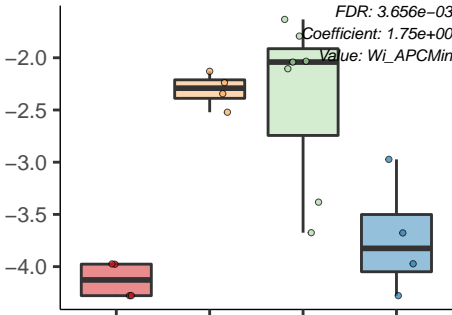

Mucispirillum

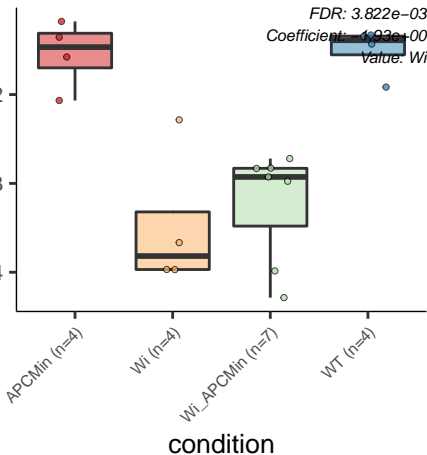

Alkaliphilus

*FDR: 3.822e-03*

*Coefficient: 1.22e+00*

*Value: Wi*

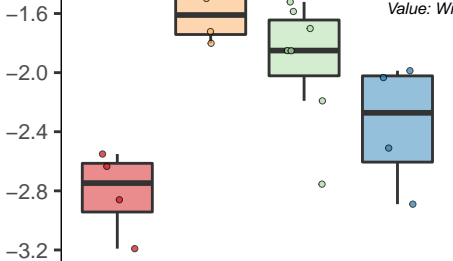

condition

Mucispirillum

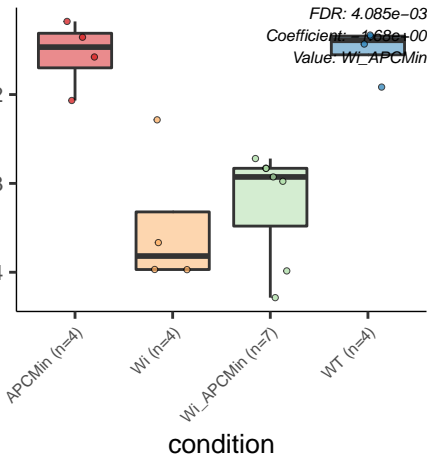

Acholeplasma

FDR: 5.279e-03

Coefficient: 1.82e+00

Value: Wi

APCMin (n=4)

Wi (n=4)

Wi\_APCMin (n=7)

WT (n=4)

condition

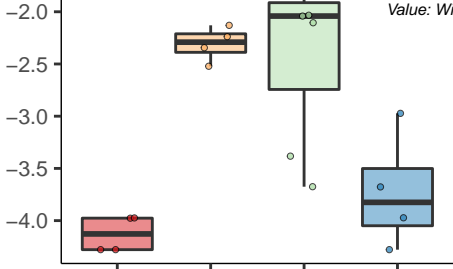

Akkermansia

FDR: 6.562e-03

Coefficient: 1.77e+00

Value: Wi\_APCMin

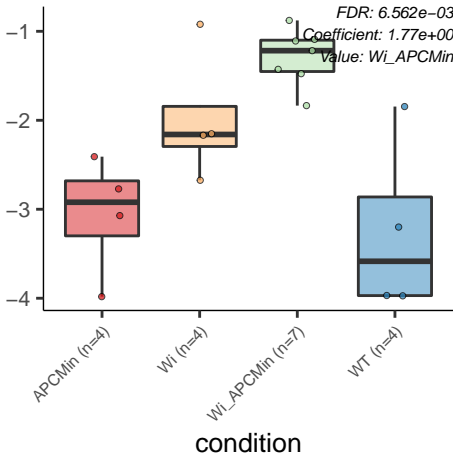

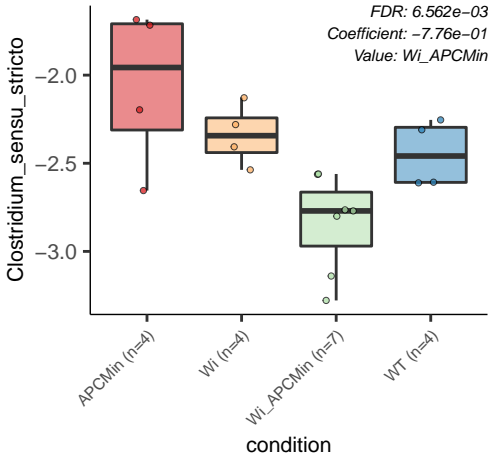

Ureaplasma

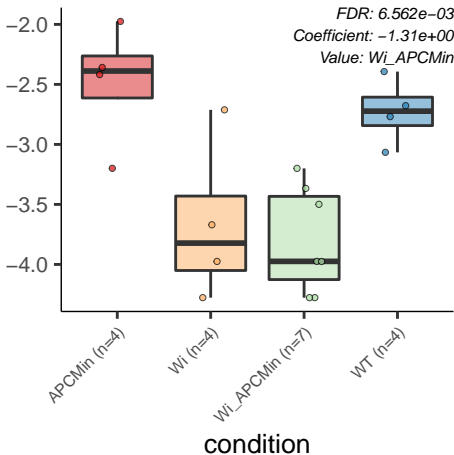



Stomatobaculum

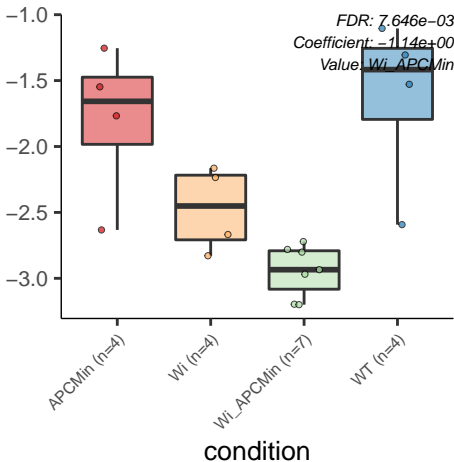

Porphyromonas

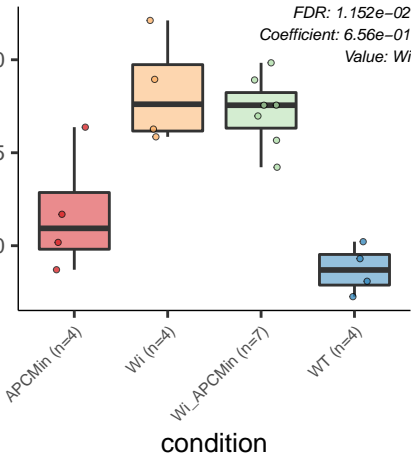

Alkaliphilus

FDR: 1.239e-02

Coefficient: 8.87e-01

Value:  $W_i\_APCMin$

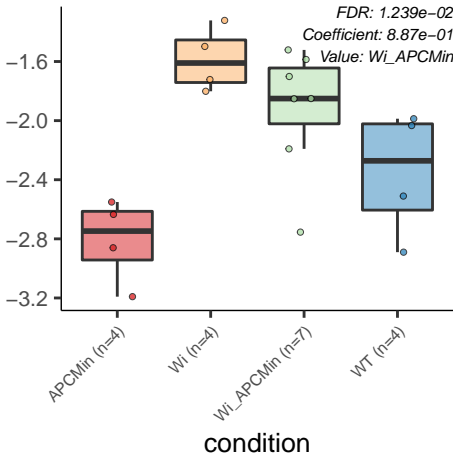

Helicobacter

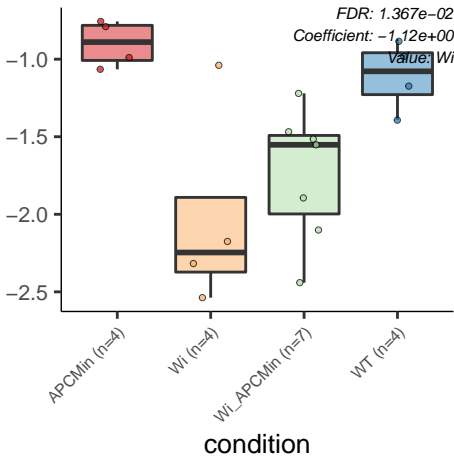

Porphyromonas

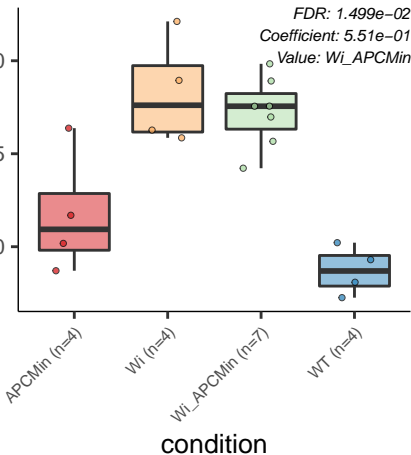

Odoribacter

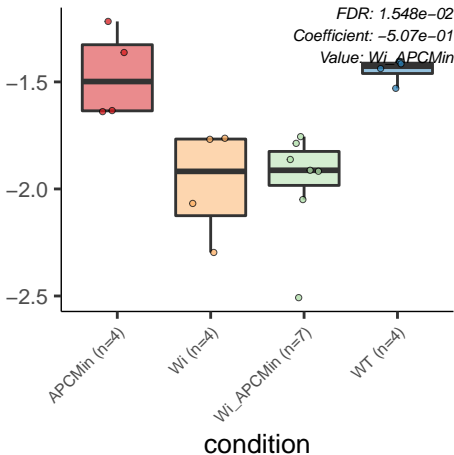

Prevotella

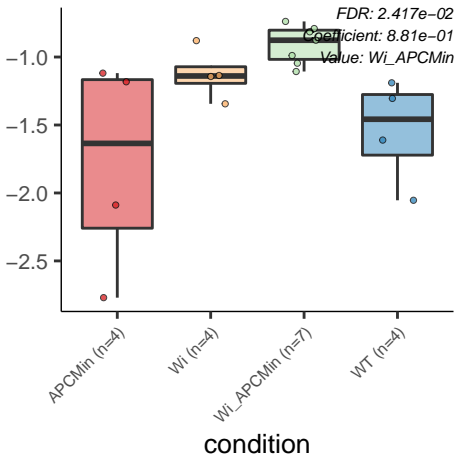

Ureaplasma

FDR:  $2.417\text{e-}02$   
Coefficient:  $-1.17\text{e}+00$   
Value:  $W_i$

APCMin (n=4)

Wi (n=4)

Wi\_APCMin (n=7)

WT (n=4)

condition

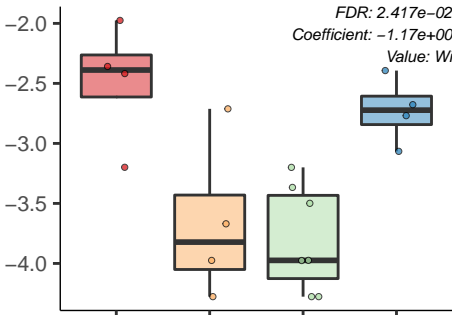



Bacteroides

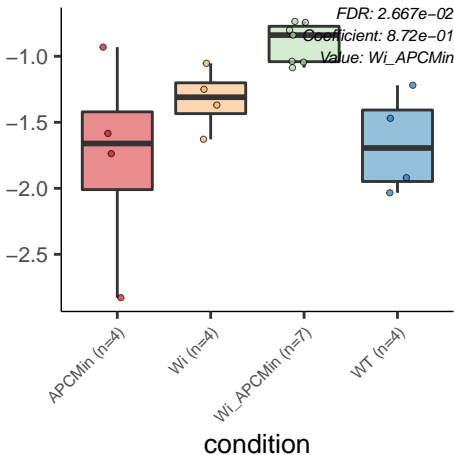

Odoribacter

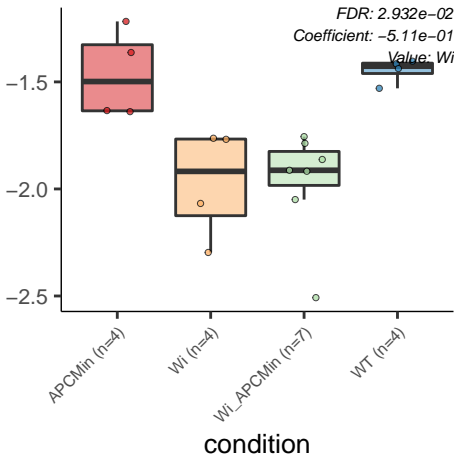

Helicobacter

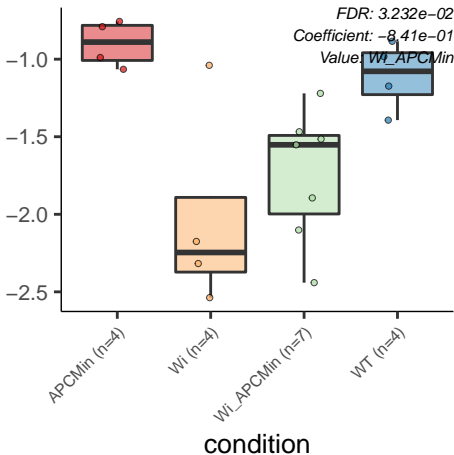

Escherichia.Shigella

FDR: 4.176e-02

Coefficient: -1.35e+00

Value: Wi

APCMin (n=4)

Wi (n=4)

Wi\_APCMin (n=7)

WT (n=4)

condition

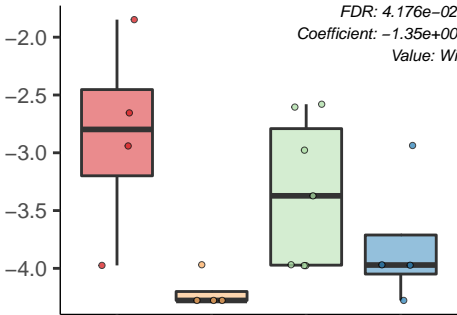

Syntrophococcus

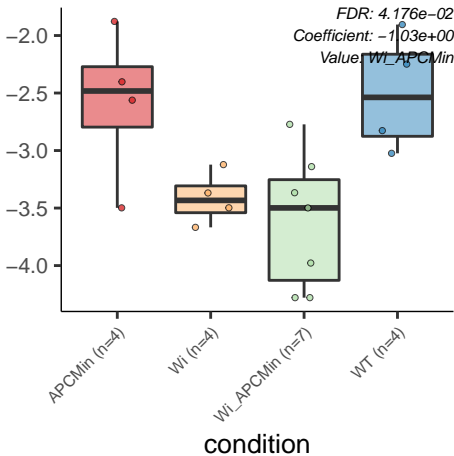

Ruminococcus

FDR:  $6.947e-02$   
Coefficient:  $1.05e+00$   
Value:  $Wi$

APCMin (n=4)

Wi (n=4)

Wi\_APCMin (n=7)

WT (n=4)

condition

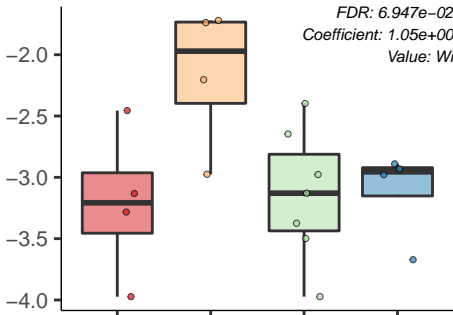

Coprobacillus

FDR: 1.116e-01

Coefficient: 9.12e-01

Value: Wi

APCMin (n=4)

Wi (n=4)

Wi\_APCMin (n=7)

WT (n=4)

condition

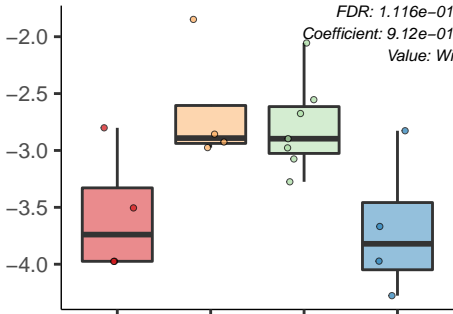

Lachnospiraceae\_incertae\_sedis

-2.0  
-2.5

APCMin (n=4)

Wi (n=4)

Wi\_APcMin (n=7)

WT (n=4)

condition

FDR: 1.309e-01  
Coefficient: -4.23e-01  
Value: Wi\_APcMin

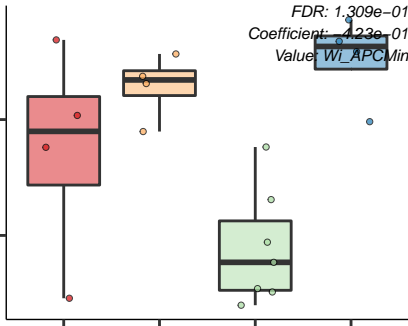



Anaerotruncus

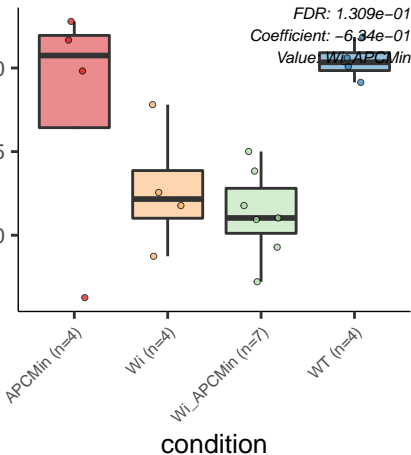

Coprobacillus

FDR: 1.309e-01

Coefficient: 7.77e-01

Value: Wi\_APCMin

APCMin (n=4)

Wi (n=4)

Wi\_APCMin (n=7)

WT (n=4)

condition

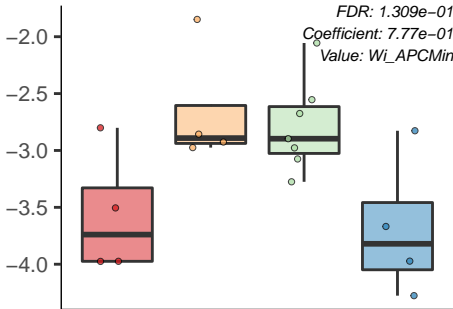

Barnesiella

FDR: 1.333e-01

Coefficient: 4.91e-01

Value: Wi\_APCMin

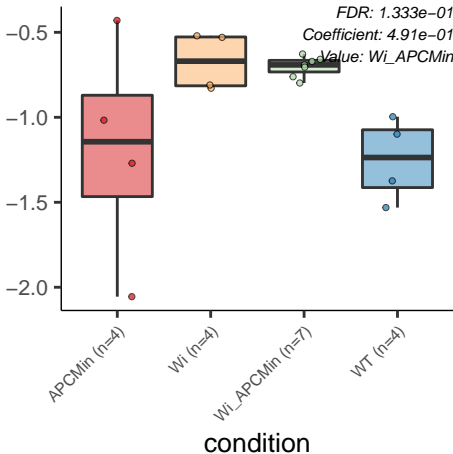

Rikenella

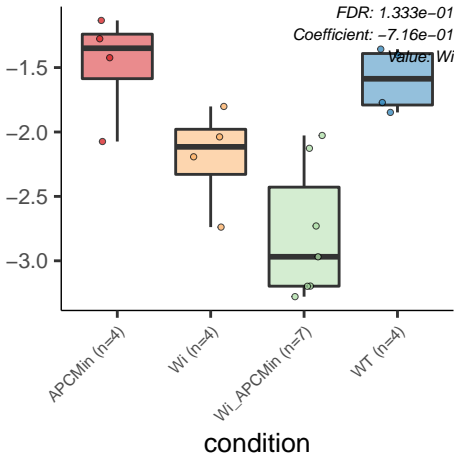

Parabacteroides

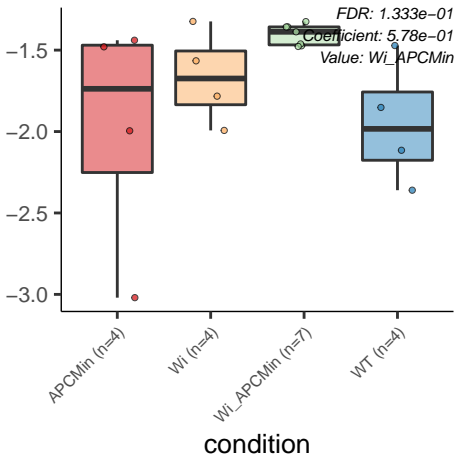

Flavonifractor

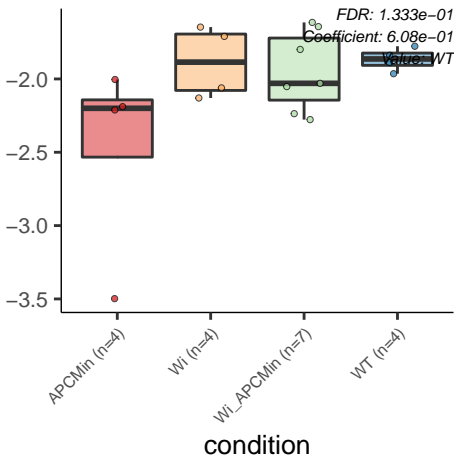

Akkermansia

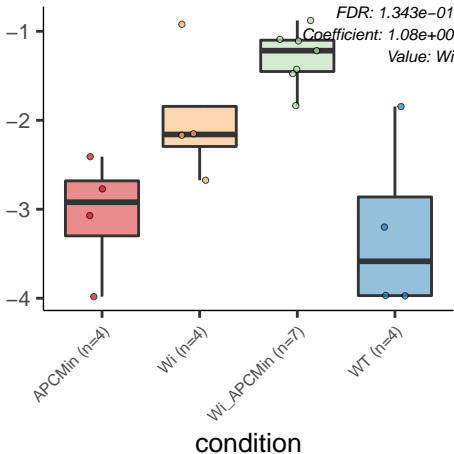

Saccharibacteria\_genera\_incertae\_sedis

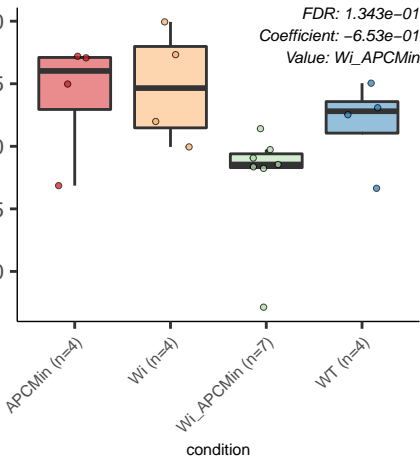



Prevotella

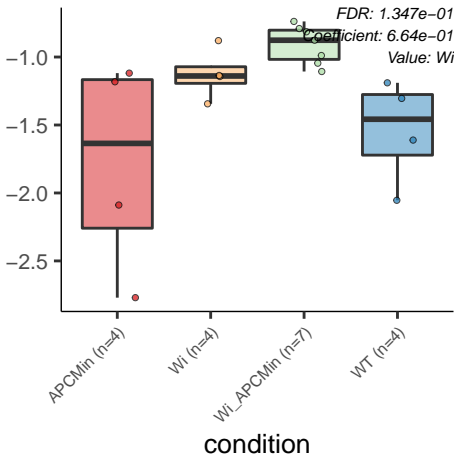

Flavonifractor

FDR: 1.357e-01

Coefficient: 5.25e-01

Value:  $W_i$  APCMin

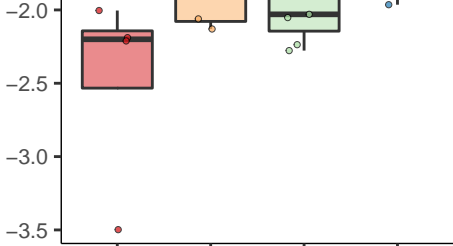

condition

Flavonifractor

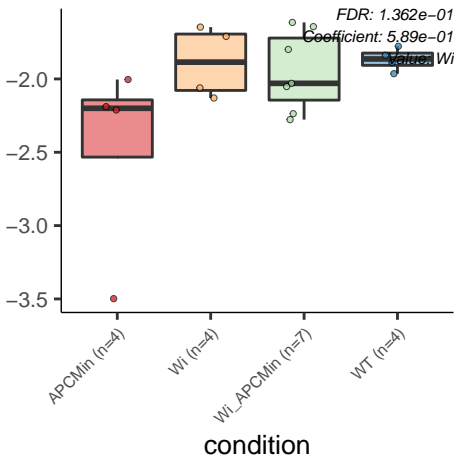

Barnesiella

*FDR: 1.412e-01*

*Coefficient: 5.21e-01*

*Value: Wi*

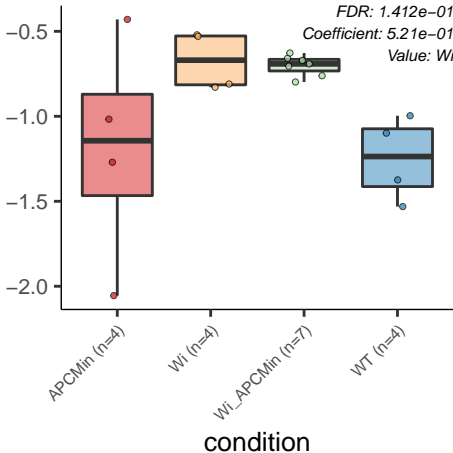

Alloprevotella

FDR: 1.465e-01

Coefficient: -5.29e-01

Value: WT

-2

-3

-4

APCMin (n=4)

Wi (n=4)

Wi\_APCMin (n=7)

WT (n=4)

condition

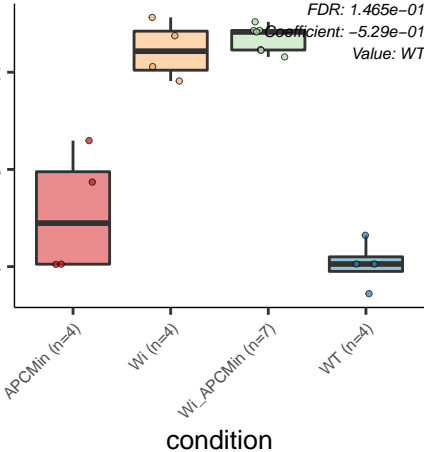

Syntrophococcus

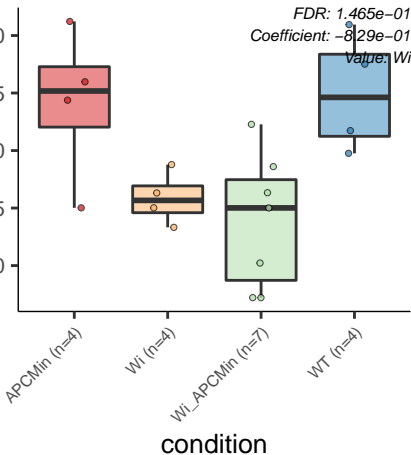

Stomatobaculum

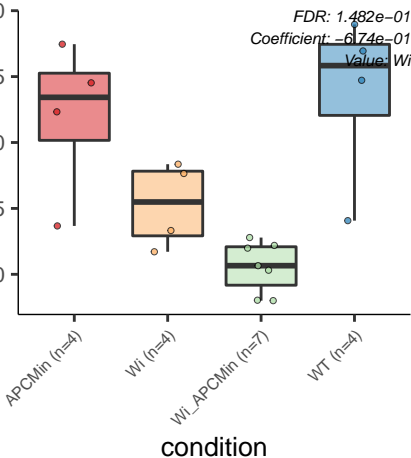

Escherichia.Shigella

FDR: 1.586e-01

Coefficient: -9.35e-01

Value: WT

APCMin (n=4)

Wi (n=4)

Wi\_APCMin (n=7)

WT (n=4)

condition

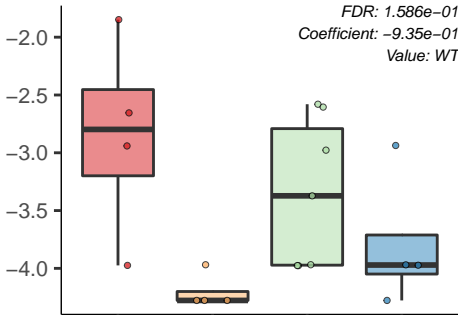



Lachnospiraceae\_incertae\_sedis

FDR:  $1.977 \times 10^{-1}$   
Coefficient:  $3.95 \times 10^{-1}$   
Value: WT

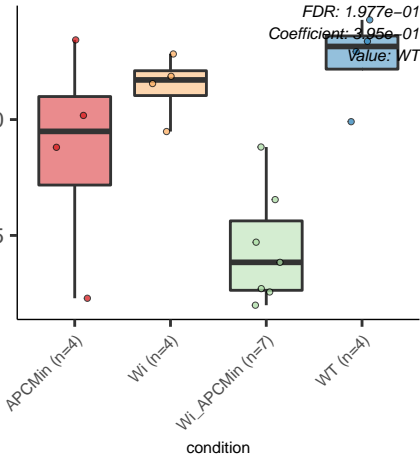

Anaeroplasm

FDR: 2.001e-01

Coefficient: -1.01e+00

Value:  $W_i$

APCMin (n=4)

$W_i$  (n=4)

$W_i$ \_APCMin (n=7)

WT (n=4)

condition

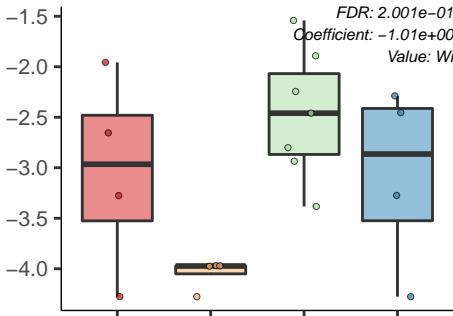

Desulfovibrio

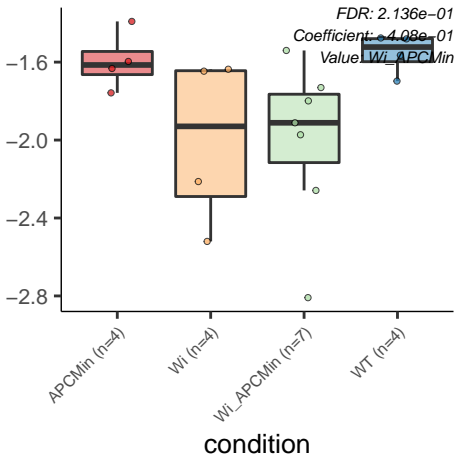

Turcibacter

FDR: 2.245e-01  
Coefficient: -9.37e-01  
Value: WT

APCMin (n=4)

Wi (n=4)

Wi\_APCMin (n=7)

WT (n=4)

condition

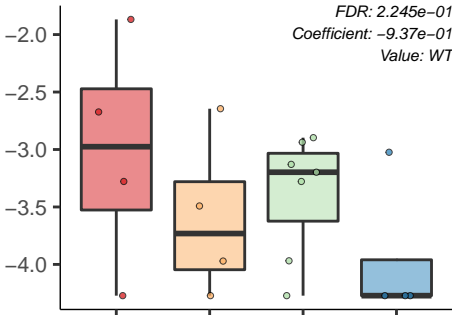

Falsiporphyrromonas

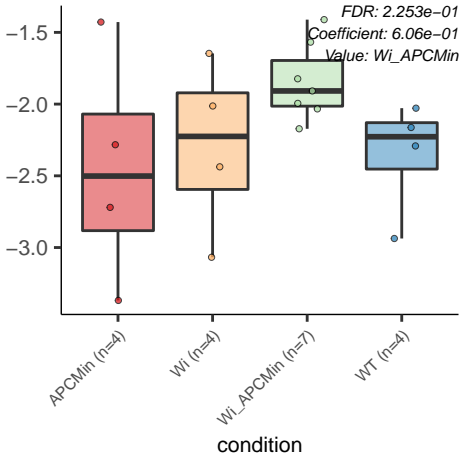

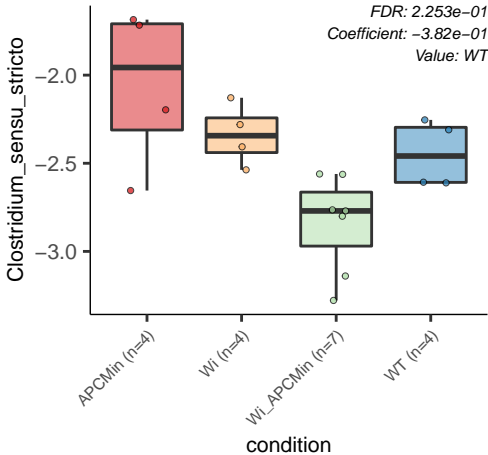

Oscillibacter

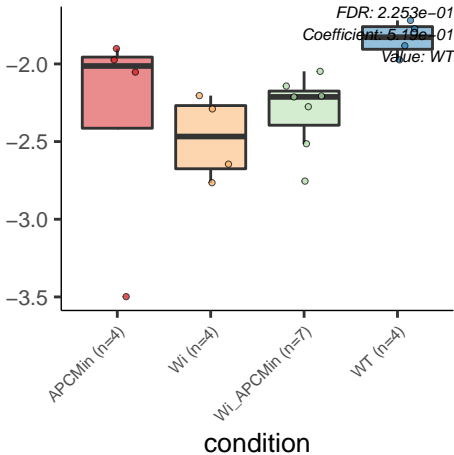

Lactobacillus

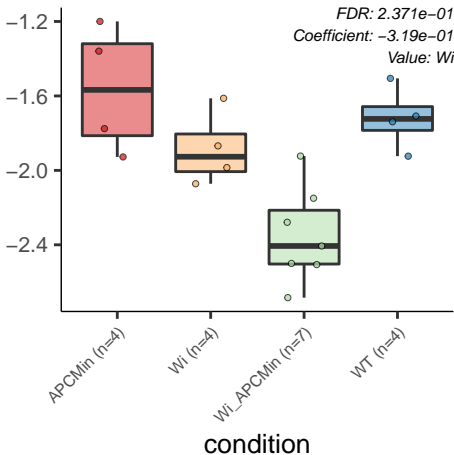



Porphyromonas

FDR: 2.371e-01

Coefficient: -3.02e-01

Value: WT

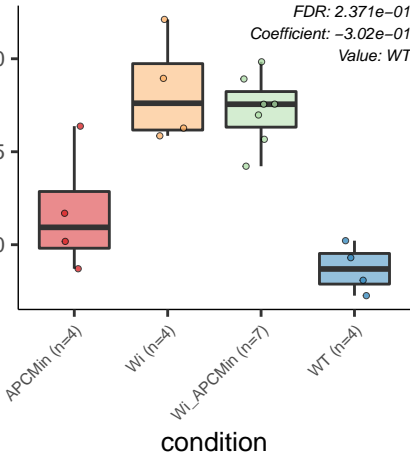

Clostridium\_XIVb

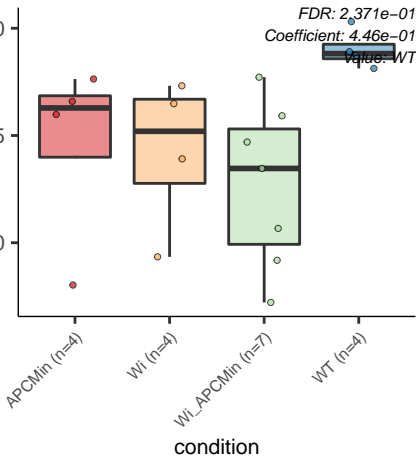

Acetatifactor

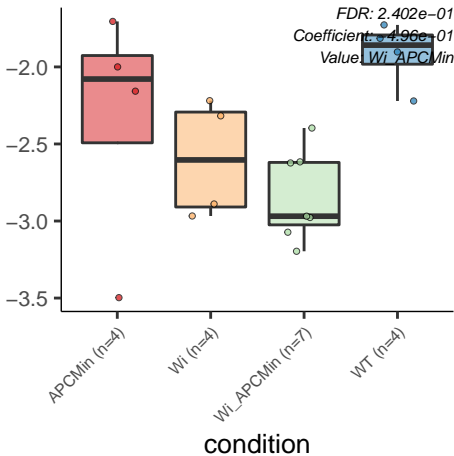

Clostridium\_IV

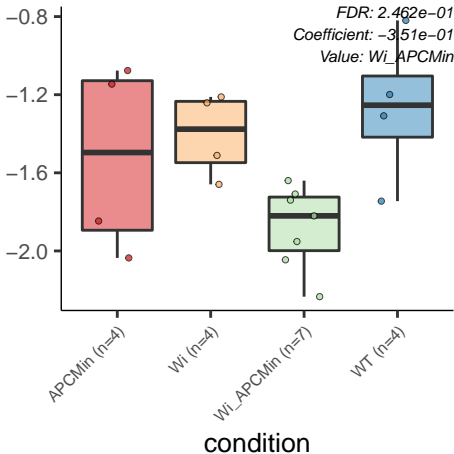

Alkaliphilus

FDR: 2.462e-01

Coefficient: 4.54e-01

Value: WT

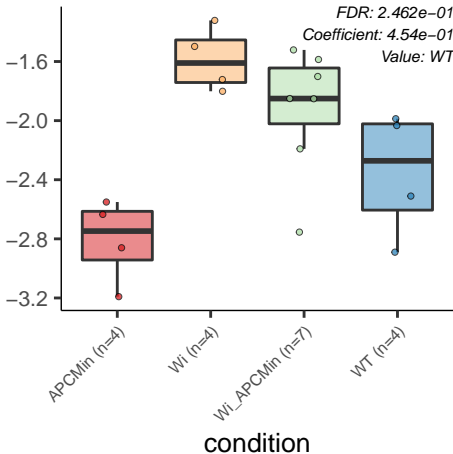

Supplement: s1 [file s1]
